# Supplementary material
Source: PubMed Central journal article supplement (PMC3298001)
Supplement: emboj2011495s1.pdf [file emboj2011495s1.pdf]

**Table S1. Table of calculated non-linear regression constants**

| <b>Condition</b> | <b>Yo</b>  | <b>A1</b>  | <b>K1</b>   | <b>A2</b> | <b>K2</b>   | <b>B</b>  | <b>R2</b> |
|------------------|------------|------------|-------------|-----------|-------------|-----------|-----------|
| WT Ctl           | 2.64±.026  | 1.64 ±.021 | 0.060±.003  | 0.42±.021 | 0.011±.001  | 0.43±.004 | 0.85      |
| WT PHA           | 2.87±.061  | 1.61±.051  | 0.046±.002  | 0.85±.012 | 0.005±.001  | 0.40±.030 | 0.91      |
| WT OKT3          | 4.12±.063  | 2.46±.051  | 0.024±.008  | 1.04±.015 | 0.005±.0011 | 0.62±.030 | 0.9       |
| STIM1            | 2.79±.045  | 1.58±.004  | 0.075±.008  | 0.60±.001 | 0.005±.008  | 0.47±.014 | 0.81      |
| STIM1 PHA        | 2.6±.031   | 1.42±.001  | 0.06±.002   | 0.63±.001 | 0.006±.001  | 0.54±.012 | 0.9       |
| STIM2            | 2.71±.026  | 1.95±.007  | 0.076±.002  | 0.30±.007 | 0.007±.001  | 0.44±.007 | 0.94      |
| Delta K          | 6.12±.071  | 4.6±.001   | 0.081±.004  | 0.55±.001 | 0.004±.001  | 1.05±.062 | 0.92      |
| Delta 597        | 3.27±.036  | 2.6±.010   | 0.076±.005  | 0.33±.010 | 0.009±.014  | 0.60±.001 | 0.91      |
| Delta P          | 4.84 ±.159 | 3.4 ±.001  | 0.071±.009  | 0.69±.007 | 0.011±.009  | 0.73±.112 | 0.65      |
| NN               | 4.57±.157  | 2.6±.0103  | 0.066±.001  | 1.11±.007 | 0.007±.004  | 0.79±.263 | 0.65      |
| Ctl-Ru360        | 3.45±.04   | 1.73±.14   | 0.050±.008  | 1.15±.14  | 0.012±.003  | 0.56±.006 | 0.91      |
| PHA-Ru360        | 4.02±.02   | 1.82±.013  | 0.051±.003  | 1.48±.013 | 0.008±.001  | 0.71±.006 | 0.98      |
| Scr Ctl          | 2.9±.030   | 2.2±.011   | 0.046±.026  | 0.12±.011 | 0.010±.007  | 0.50±.002 | 0.78      |
| Scr PHA          | 3.1±.012   | 2.28±.003  | 0.050±.027  | 0.35±.003 | 0.004±.003  | 0.46±.003 | 0.78      |
| S1KD Ctl         | 2.0±.011   | 1.5±.004   | 0.030±.001  |           |             | 0.50±.001 | 0.86      |
| S1KD PHA         | 1.70±.023  | 1.15±.005  | 0.03±.002   |           |             | 0.55±.004 | 0.83      |
| Ctl-BTP2         | 2.29±.012  | 1.86±.016  | .020 ± .001 |           |             | 0.43±.001 | 0.94      |
| PHA-BTP2         | 2.16±.023  | 1.69±.023  | .013 ± .001 |           |             | 0.47±.001 | 0.78      |

Constants were obtained from the equations:  $Y = B + A_1(-K_1 * t) + A_2(-K_2 * t)$  or  $Y = B + A_1(-K_1 * t)$ , where B is the plateau of decay, K<sub>1</sub> and K<sub>2</sub> are rate constants for the fast and slow phase, respectively. A<sub>1</sub> and A<sub>2</sub> are the amplitudes for the fast and slow phase of decay, respectively. t is time.

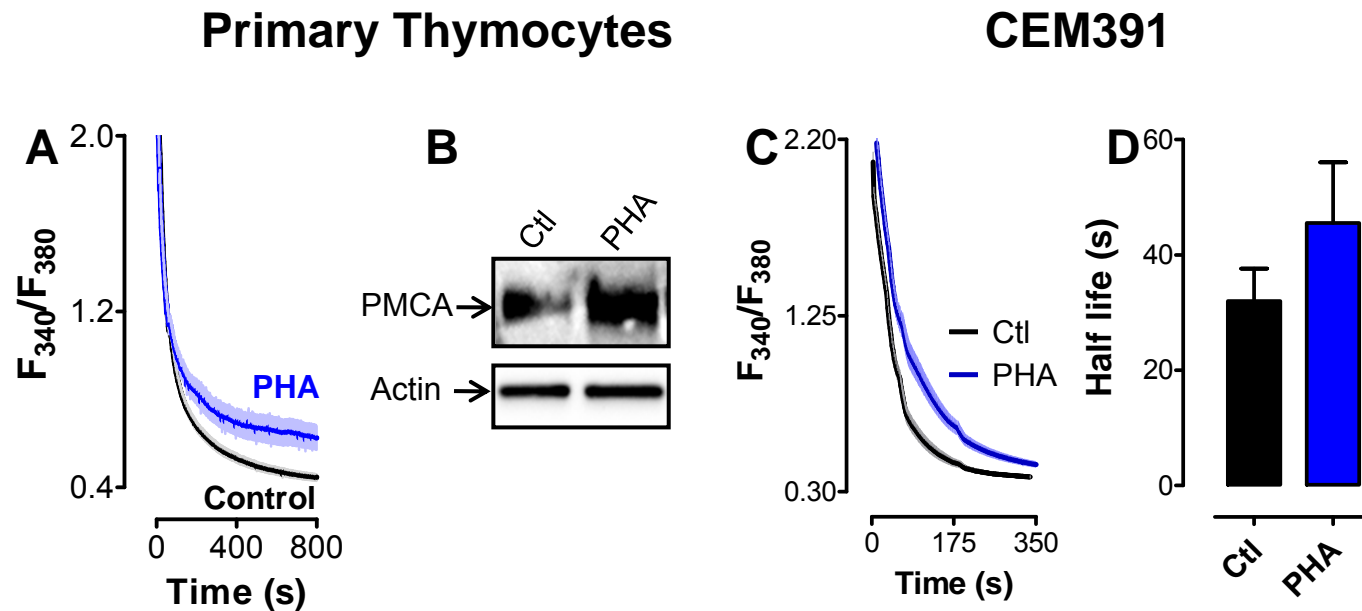

**Figure S1: PHA-mediated changes in PMCA expression and function in T cells.** Freshly isolated primary murine thymocytes were treated with PHA or vehicle for 2 hours before assessing  $[Ca^{2+}]_c$  clearance (**A**, representative trace of multiple experiments) or analyzing PMCA and actin protein expression by Western blot (**B**)  $[Ca^{2+}]_c$  clearance was analyzed in CEM391 T cells after treatment with PHA or vehicle for two hours. Representative traces of multiple experiments (**C**) are shown and analyzed by one-phase, nonlinear regression (**D**) (ctl,  $\overline{R^2} = .74$ ,  $n=5$ ; PHA,  $\overline{R^2} = .72$ ,  $n=5$ ).

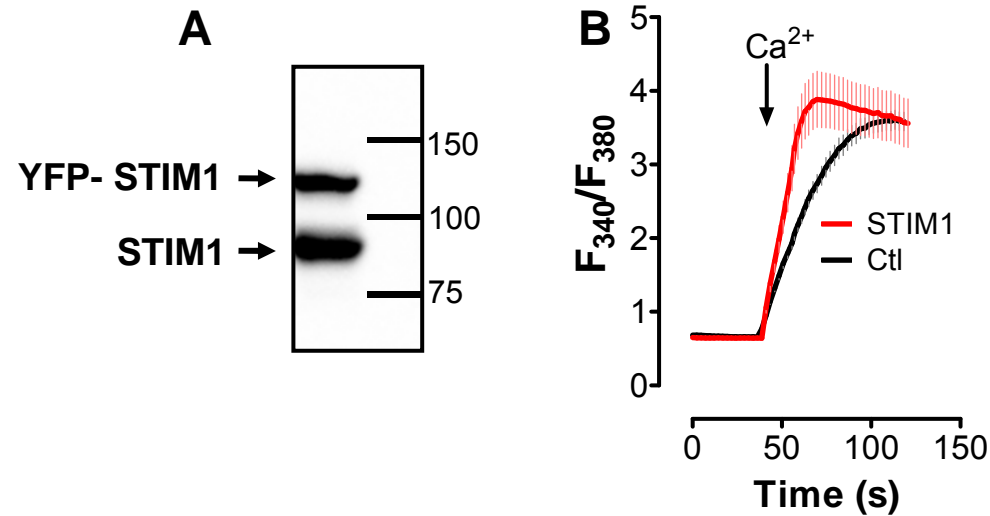

**Figure S2: YFP-STIM1 transfections control STIM1 expression and function. (A)** WT Jurkat cells were transfected with YFP or YFP-STIM1. 48 hours after transfection, cells were harvested for cell lysis and analyzed for expression of STIM1 by Western blot. **(B)** Representative traces of multiple experiments assessing the magnitude of SOCE in Jurkat cells 48 hours after transfection with YFP or STIM1.

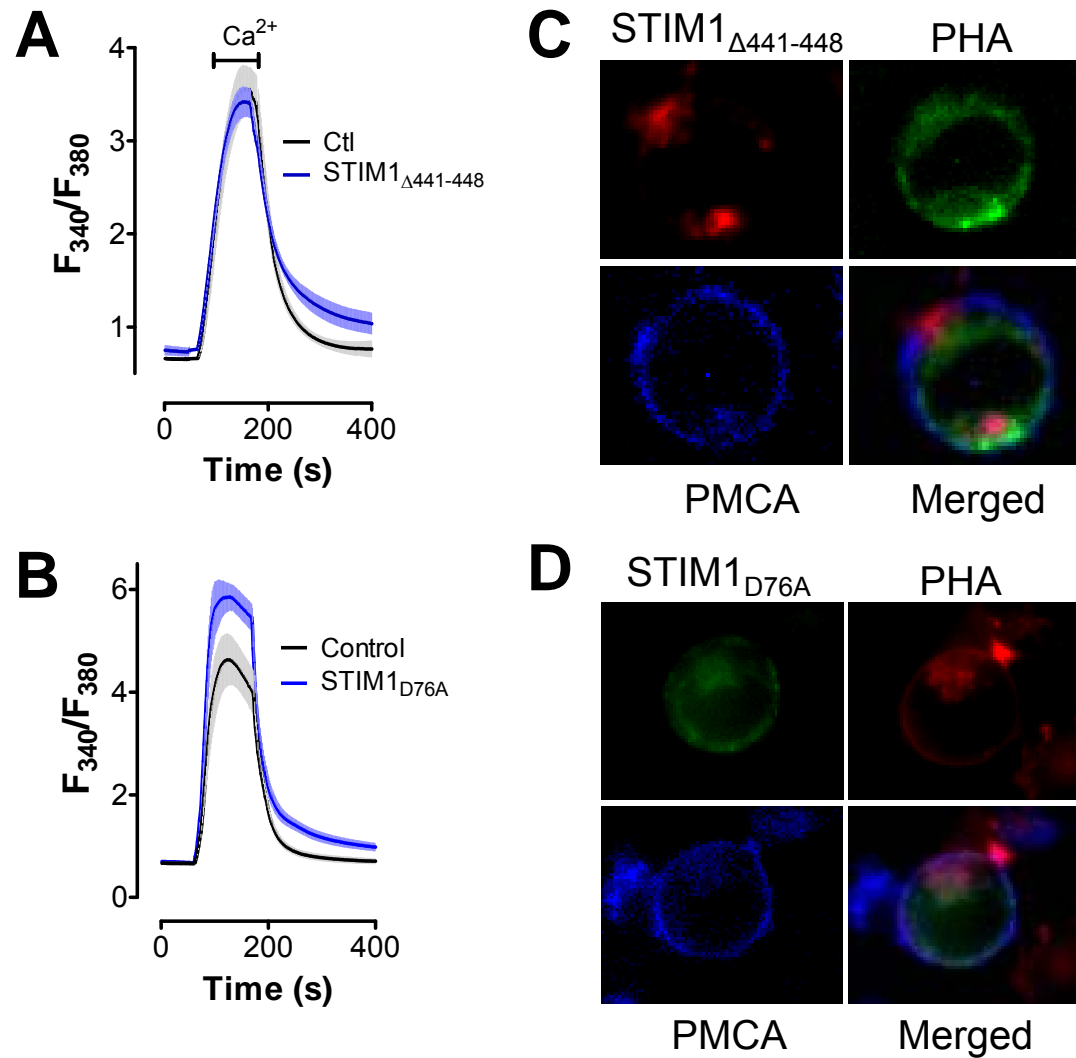

**Figure S3: Control of Orai1 function and PMCA function by STIM1 are independent. (A,B)**  $[Ca^{2+}]_c$  clearance was analyzed in Jurkat T cells after transfection with YFP (A,B), YFP- $STIM1_{\Delta 441-448}$  (A) or YFP- $STIM1_{D76A}$  (B). (C,D) Co-localization of YFP- $STIM1_{\Delta 441-448}$  (C) or YFP- $STIM1_{D76A}$  (D) with CFP-PMCA and Alexafluor594-tagged PHA was determined by fluorescence microscopy.

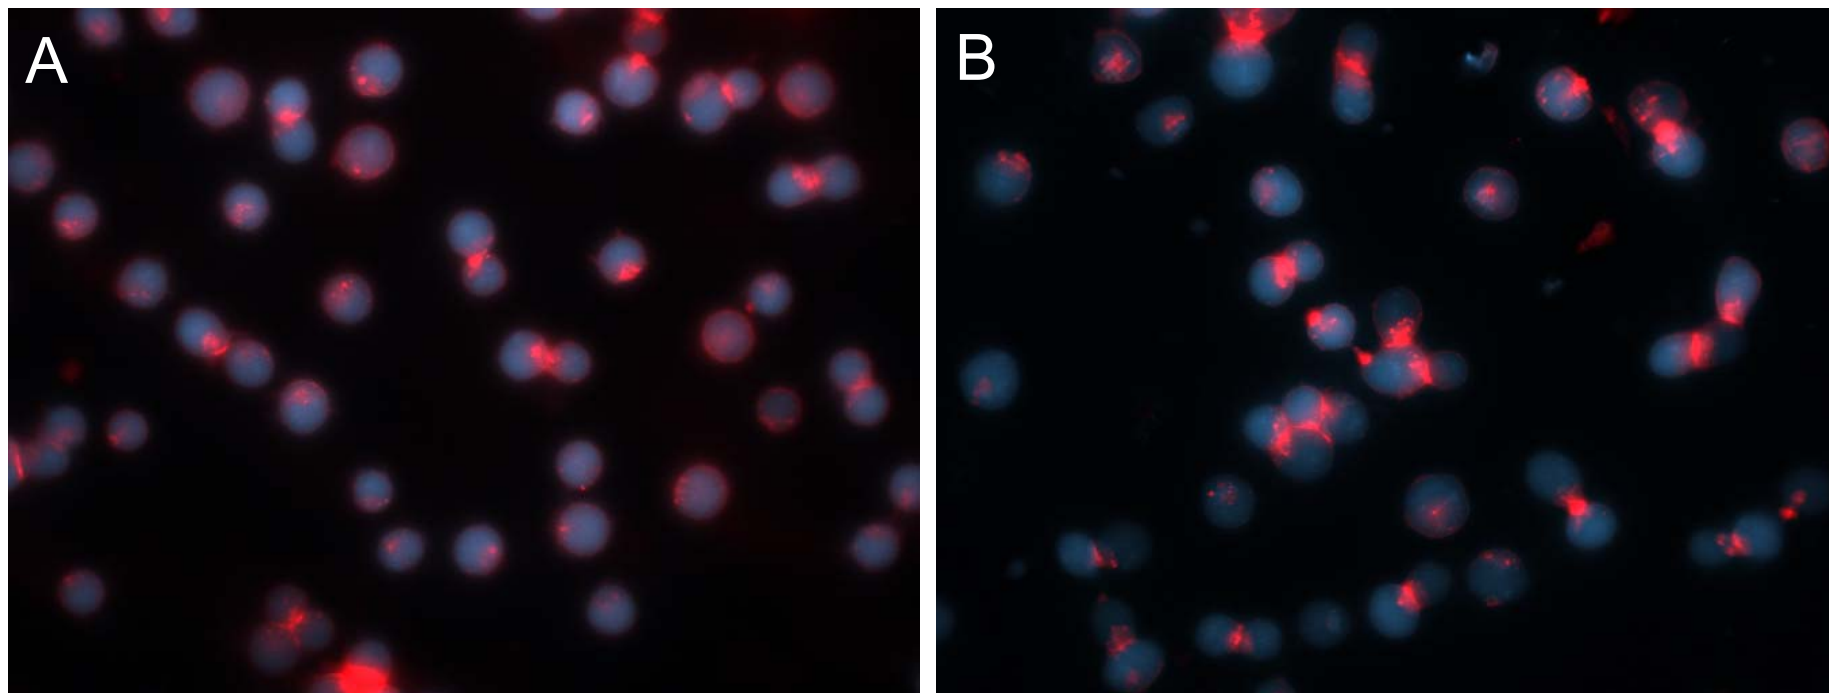

**Figure S4: Localization of tagged PHA in full fields of Jurkat T cells.** Jurkat cells were transfected with Scr RNA (**A**) or STIM1 siRNA (**B**) and treated with 1  $\mu\text{g}/\text{ml}$  Alexa Fluor 594 conjugated PHA for two hours, mounted on a cover slip and PHA cytolocalization was assessed. See **supplemental movie 1 or 2** for Fura-2 based  $\text{Ca}^{2+}$  images of these fields.

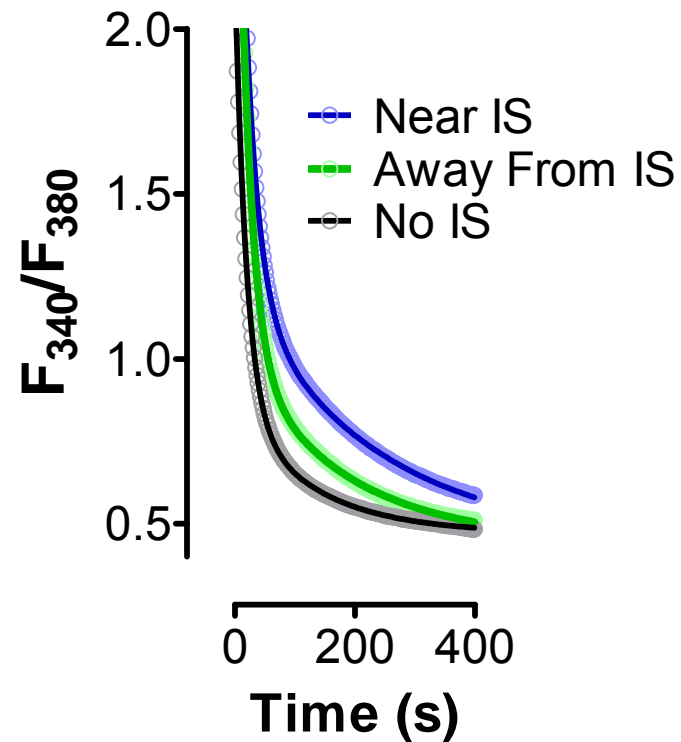

**Figure S5: Comparison of  $[Ca^{2+}]_c$  clearance rates at the IS vs. other regions of the cell.** Jurkat T cells were treated with PHA or vehicle and loaded with fura-2 for 1 hr and depleting ER  $Ca^{2+}$  stores with Tg (2  $\mu$ M) in the absence of  $[Ca^{2+}]_e$  (not depicted). Once  $[Ca^{2+}]_c$  had returned to baseline,  $[Ca^{2+}]_e$  was elevated to 1 mM; upon reaching peak  $[Ca^{2+}]_c$ ,  $[Ca^{2+}]_e$  was again removed.  $[Ca^{2+}]_c$  was assessed as global (away from IS) or local  $Ca^{2+}$  signals (near IS) in PHA treated cells and compared to global  $Ca^{2+}$  signals in vehicle treated (Control) cells.

**Supplemental Movie 1: Comparison of local changes in  $[Ca^{2+}]_c$  during Jurkat T cell activation.** Jurkat cells were transfected with Scr RNA and treated with 1  $\mu$ g/ml Alexa Fluor 594 for two hours, mounted on a cover slip before loading with fura-2 and assessing changes  $[Ca^{2+}]_c$ . High resolution images were taken every two seconds. The images were recorded for 30 seconds before the addition of 1 mM  $[Ca^{2+}]_e$ .  $Ca^{2+}$  was then removed and the recording continued. Movie is shown in 10x speed. Note that localization of PHA for these images is depicted in figure S4A.

**Supplemental Movie 2: Comparison of local changes in  $[Ca^{2+}]_c$  during T cell activation after STIM1 knockdown.** Jurkat cells were transfected with STIM1 siRNA and treated with 1  $\mu$ g/ml Alexa Fluor 594 for two hours, mounted on a cover slip before loading with fura-2 and assessing changes  $[Ca^{2+}]_c$ . High resolution images were taken every two seconds. The images were recorded for 30 seconds before the addition of 10 mM  $[Ca^{2+}]_e$ .  $Ca^{2+}$  was then removed and the recording continued. Movie is shown in 10x speed. Note that localization of PHA for these images is depicted in figure S4B.
